# Supplementary material for: Highly reversible, dendrite-free and low-polarization Zn metal anodes enabled by a thin SnO2layer for aqueous Zn-ion batteries
Source: Royal Society of Chemistry journal article supplement (doi:10.1039/d3ta01415k), 2023-01-01
Supplement: d3ta01415k1.pdf [file d3ta01415k1.pdf]

# Highly reversible, dendrite-free and low polarization Zn metal anodes enabled by a thin SnO<sub>2</sub> layer for aqueous Zn-ion batteries

Yuejuan Zhang,<sup>a,b</sup> Penghui Chen,<sup>a,b</sup> Mingming Li,<sup>a,b</sup> Shaoqing Li,<sup>a,b</sup> Ying Yue,<sup>a,b</sup> Yanchun Wang,<sup>a,d</sup> Sishen Xie,<sup>a-d</sup> Weiya Zhou<sup>a-d</sup>\*

<sup>a</sup>Beijing National Laboratory for Condensed Matter Physics, and Institute of Physics, Chinese Academy of Sciences, Beijing, 100190, China.

<sup>b</sup>School of Physical Sciences, and College of Materials Science and Opto-Electronic Technology, University of Chinese Academy of Sciences, Beijing, 100049, China.

<sup>c</sup>Songshan Lake Materials Laboratory, Dongguan, Guangdong, 523808, China.

<sup>d</sup>Beijing Key Laboratory for Advanced Functional Materials and Structure Research, Beijing, 100190, China.

\* Corresponding Authors.

E-mail: wyzhou@iphy.ac.cn

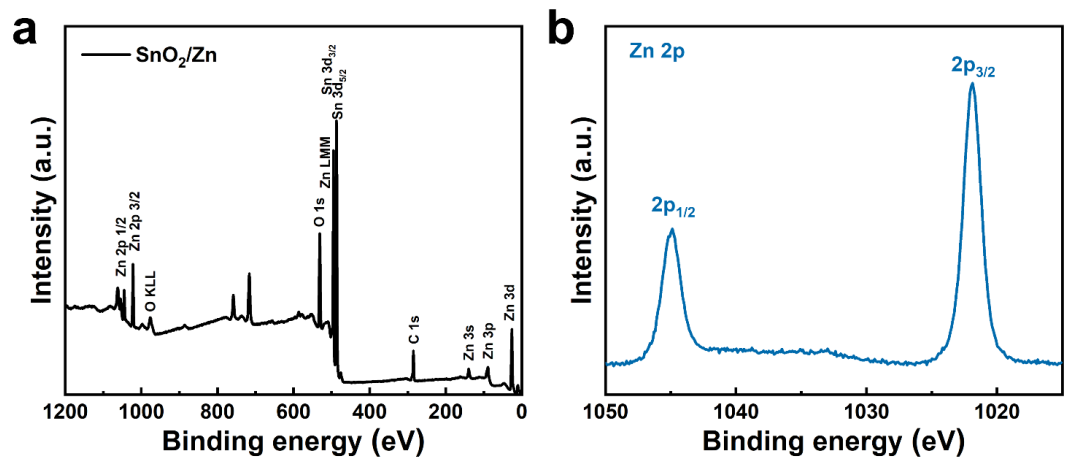

**Fig. S1.** (a) XPS survey spectrum of the SnO<sub>2</sub>/Zn electrode and (b) the high-resolution scan of Zn 2p.

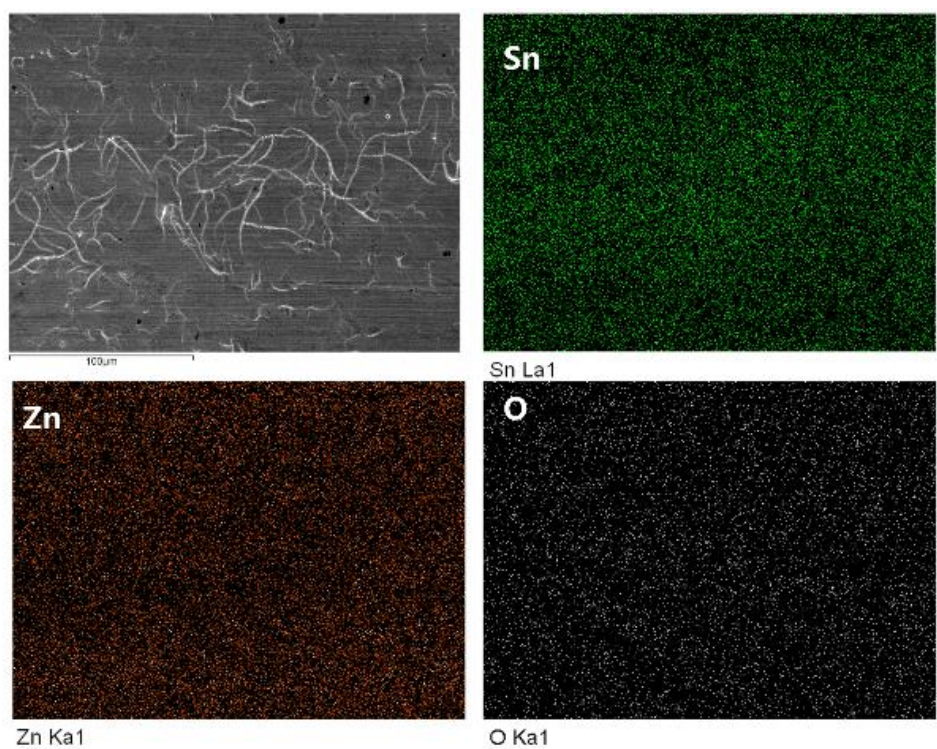

**Fig. S2.** SEM image and elemental mappings of the SnO<sub>2</sub>/Zn electrode

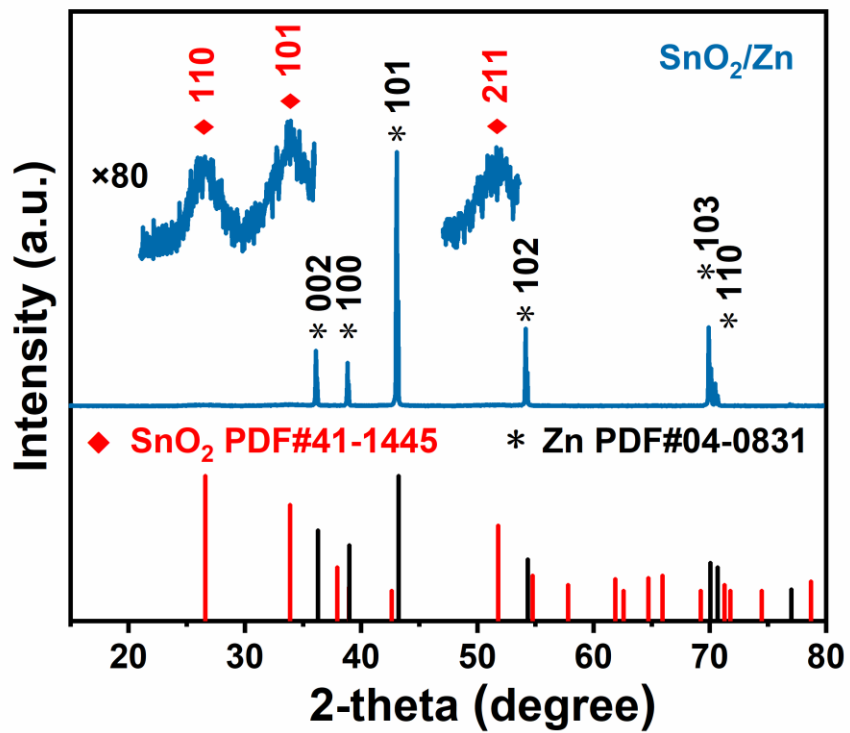

Fig. S3. GIXRD patterns of the SnO<sub>2</sub>/Zn electrode

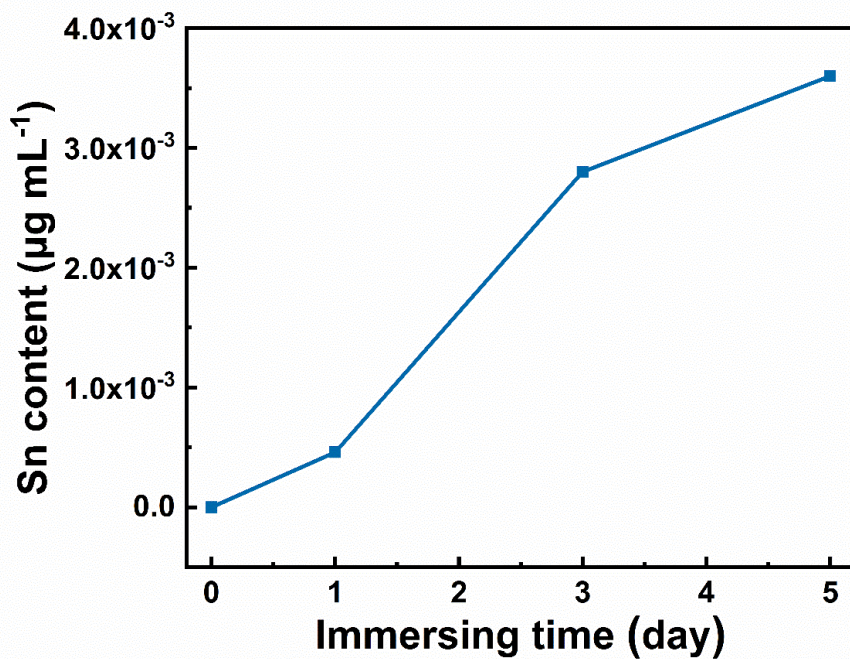

Fig. S4. The Sn content in the 2 M ZnSO<sub>4</sub> electrolyte (5 mL) after immersing SnO<sub>2</sub>/Zn electrodes (Φ 12 mm, 5 disks) for different times

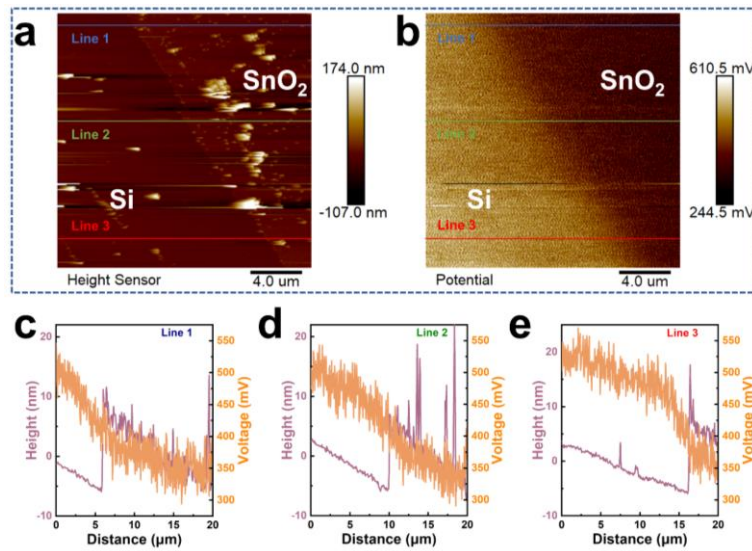

**Fig. S5.** (a) AFM topography image and (b) the corresponding surface potential of SnO<sub>2</sub>/Si. (c-e) The cross-section line profiles indicated in (a, b).

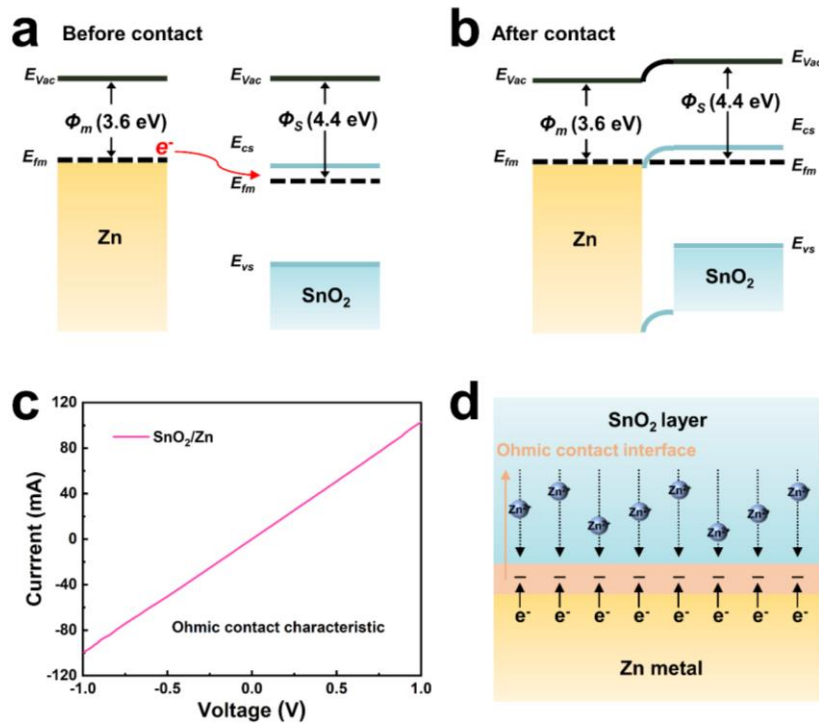

**Fig. S6.** The band structure of Zn metal and n-type semiconductor SnO<sub>2</sub> (a) before and (b) after contact. (c) The I-V curve of the SnO<sub>2</sub>/Zn electrode. (d) A schematic illustration for the formation of an ohmic contact interface between SnO<sub>2</sub> and Zn metal and the resulting electron-rich region inducing rapid and uniform Zn<sup>2+</sup> transport inward.

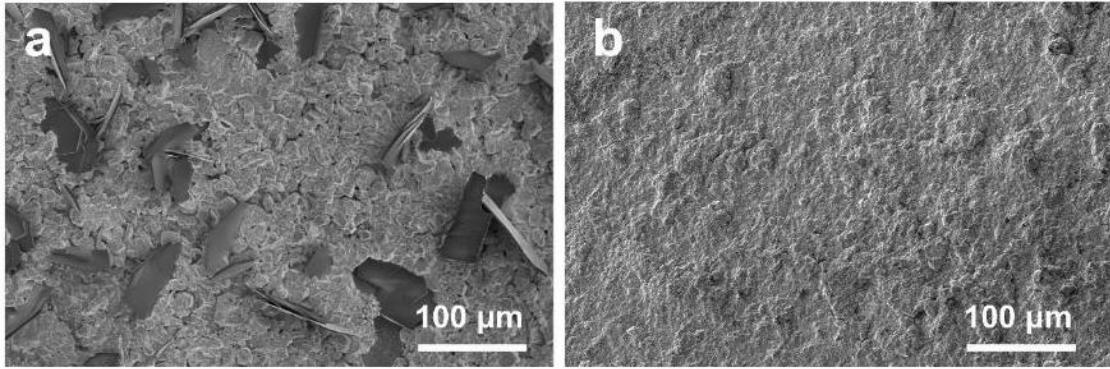

**Fig. S7.** SEM images of electrode surface of (a) bare Zn and (b) SnO<sub>2</sub>/Zn after plating Zn at 10 mA cm<sup>-2</sup> and 10 mAh cm<sup>-2</sup>.

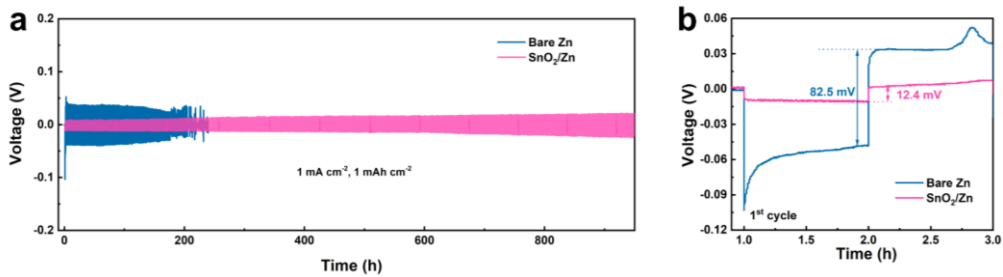

**Fig. S8.** (a) Long-term galvanostatic cycling of symmetric cells and (b) the corresponding time-voltage profiles with bare Zn and SnO<sub>2</sub>/Zn electrodes at 1 mA cm<sup>-2</sup>.

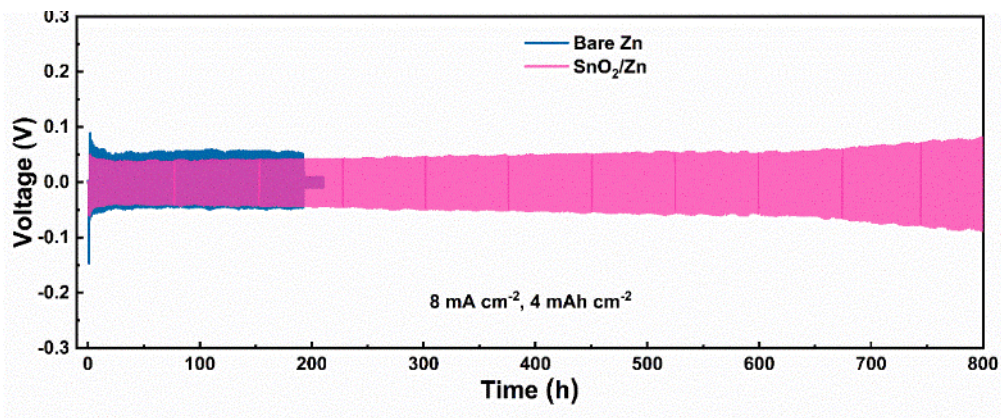

**Fig. S9.** Cycling performance of symmetries cells with bare Zn and SnO<sub>2</sub>/Zn electrodes at 8 mA cm<sup>-2</sup> and 4 mAh cm<sup>-2</sup>

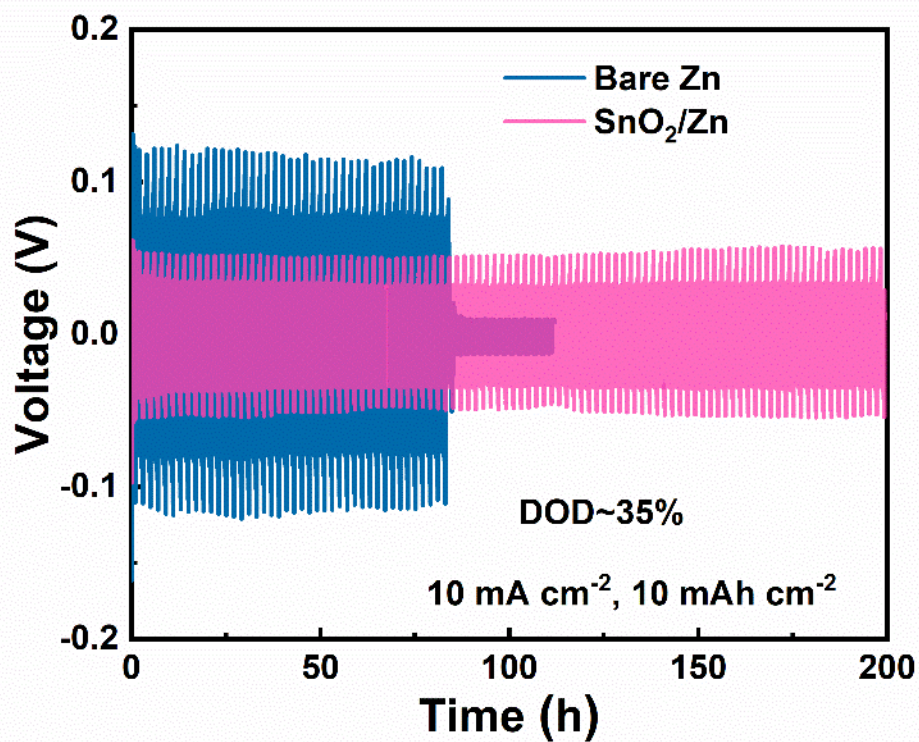

Fig. S10. Cycling performance of symmetries cells with bare Zn and SnO<sub>2</sub>/Zn electrodes at 10 mA cm<sup>-2</sup> and 10 mAh cm<sup>-2</sup> (depth of discharge of ~ 35%)

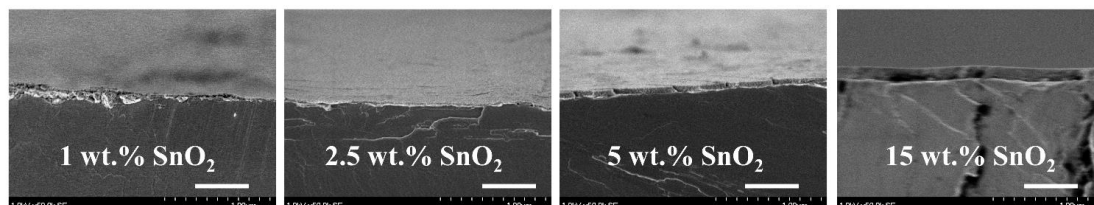

Fig. S11. Cross-sectional SEM images of SnO<sub>2</sub>/Zn electrodes prepared with different concentrations of SnO<sub>2</sub> solution. Scale bar: 500 nm.

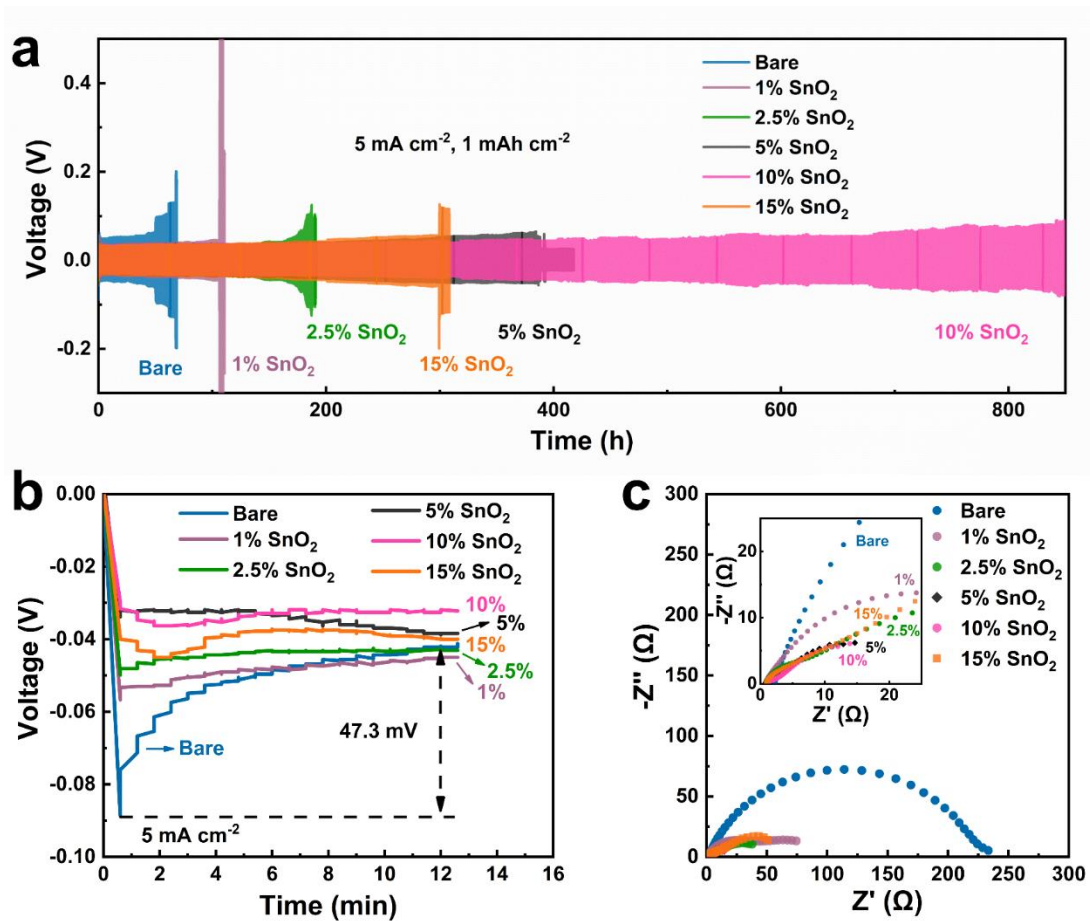

**Fig. S12.** (a) Galvanostatic cycling of symmetric cells and (b) the corresponding nucleation overpotentials based on the Zn anodes without and with SnO<sub>2</sub> layers. (c) EIS spectra (Nyquist plots) of Zn symmetrical cells without and with SnO<sub>2</sub> layers.

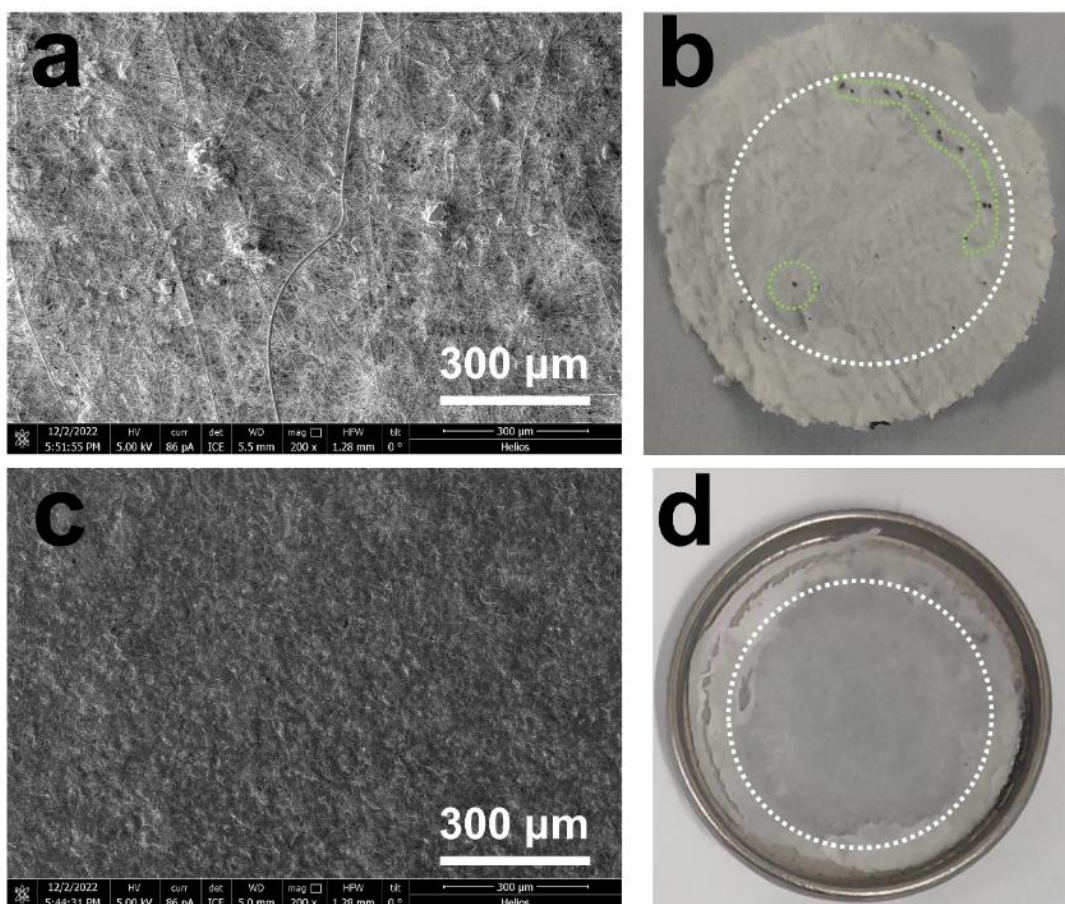

**Fig. S13.** (a) SEM image of 1% SnO<sub>2</sub>/Zn anode surface after 415 cycles and (b) the corresponding photos of the disassembled separator. (c) SEM image of the 15% SnO<sub>2</sub>/Zn anode surface after 465 cycles and (d) the corresponding photos of the disassembled separator.



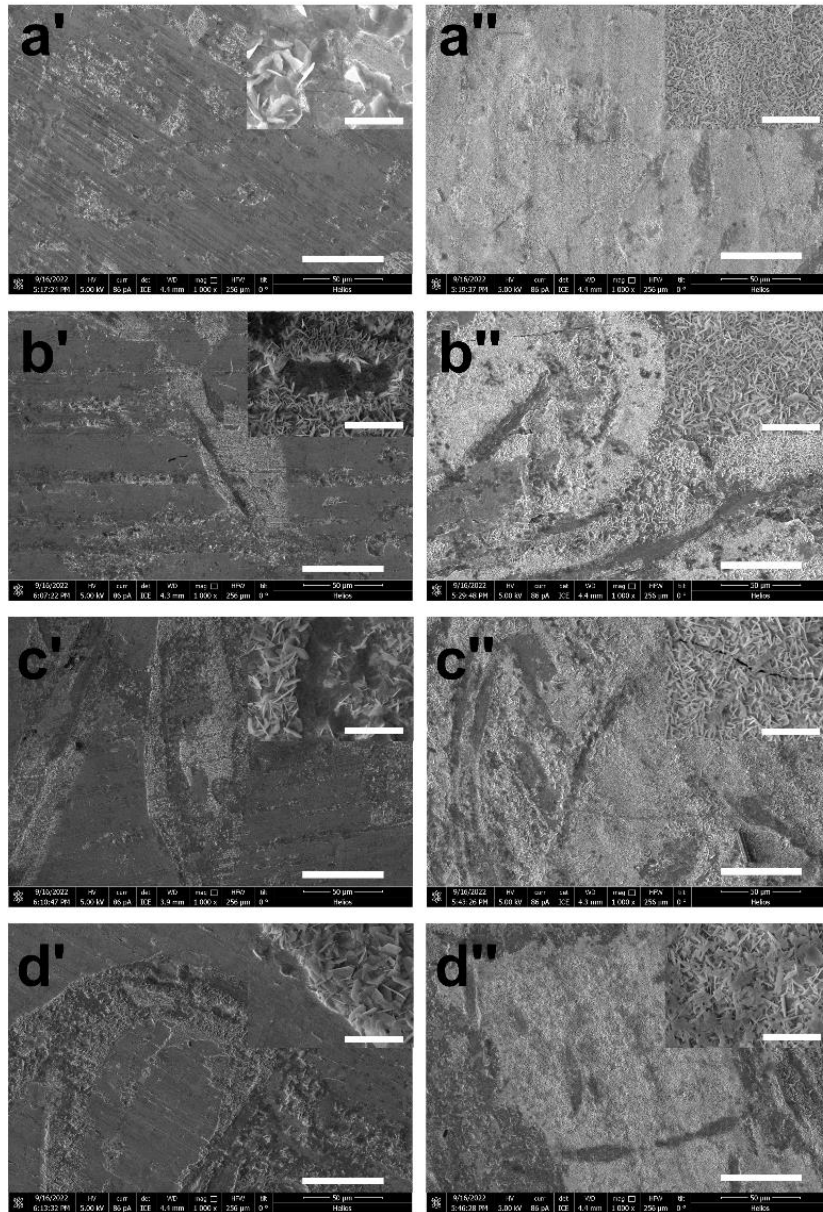

**Fig. S14.** SEM images of (a'-d') bare Zn and (a''-d'') SnO<sub>2</sub>/Zn electrodes after plating different amount of Zn: (a', a'') 0.01 mAh cm<sup>-2</sup> at 0.1 mA cm<sup>-2</sup>; (b', b'') 0.05 mAh cm<sup>-2</sup> at 0.1 mA cm<sup>-2</sup>; (c', c'') 0.1 mAh cm<sup>-2</sup> at 1 mA cm<sup>-2</sup>; (d', d'') 0.5 mAh cm<sup>-2</sup> at 1 mA cm<sup>-2</sup>. Scale bar: 50 μm. The insets are the corresponding enlarged images and their scale bar is 5 μm.

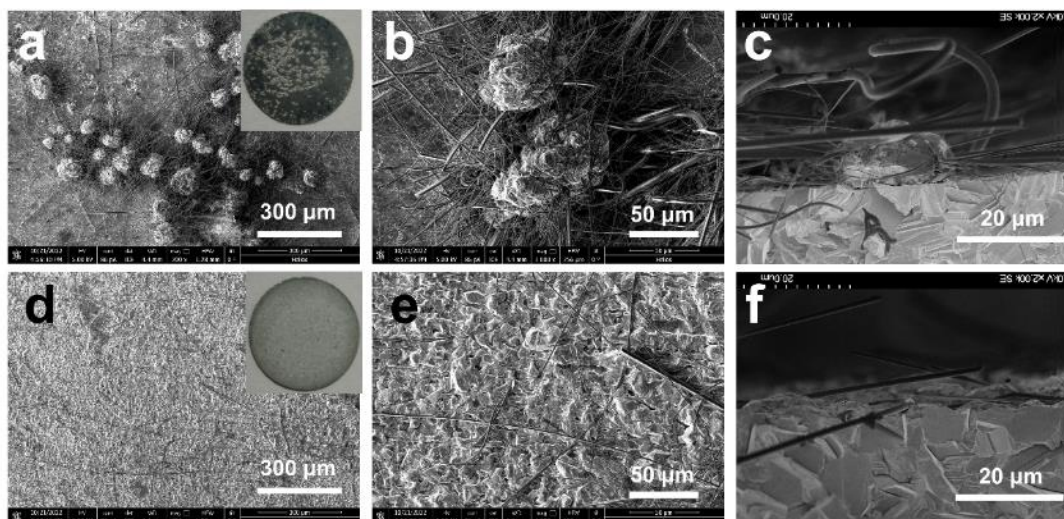

**Fig. S15.** SEM images of (a-c) bare Zn and (d-f) SnO<sub>2</sub>/Zn electrodes at different magnifications and corresponding cross-sectional images after plating Zn for 1 mAh cm<sup>-2</sup> at 1 mA cm<sup>-2</sup>.

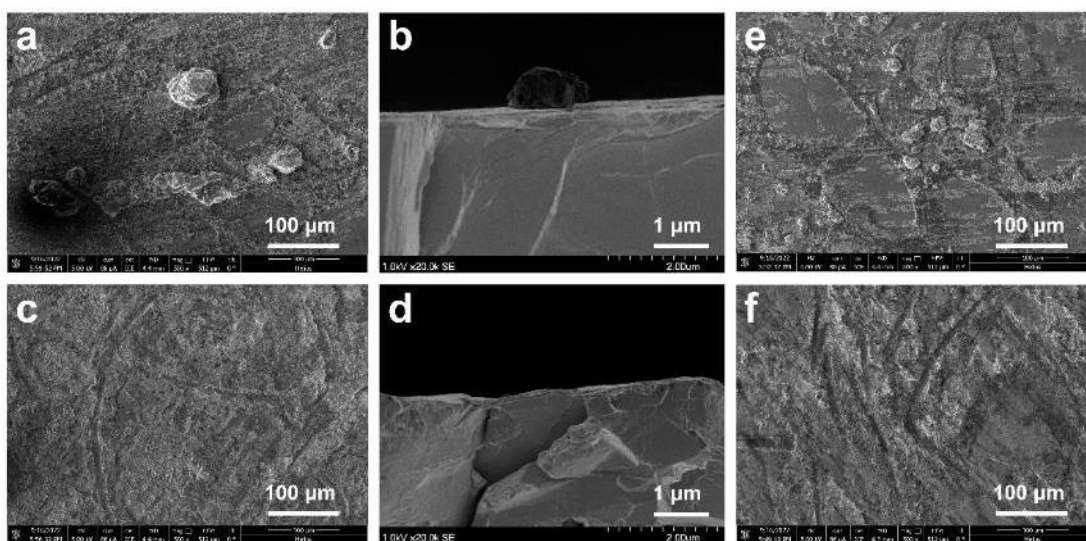

**Fig. S16.** SEM images of the anode surface on (a, b) bare Zn and (c, d) SnO<sub>2</sub>/Zn, and the cathode surface on (e) bare Zn and (f) SnO<sub>2</sub>/Zn after 20 cycles at 8 mA cm<sup>-2</sup> and 0.4 mAh cm<sup>-2</sup>.

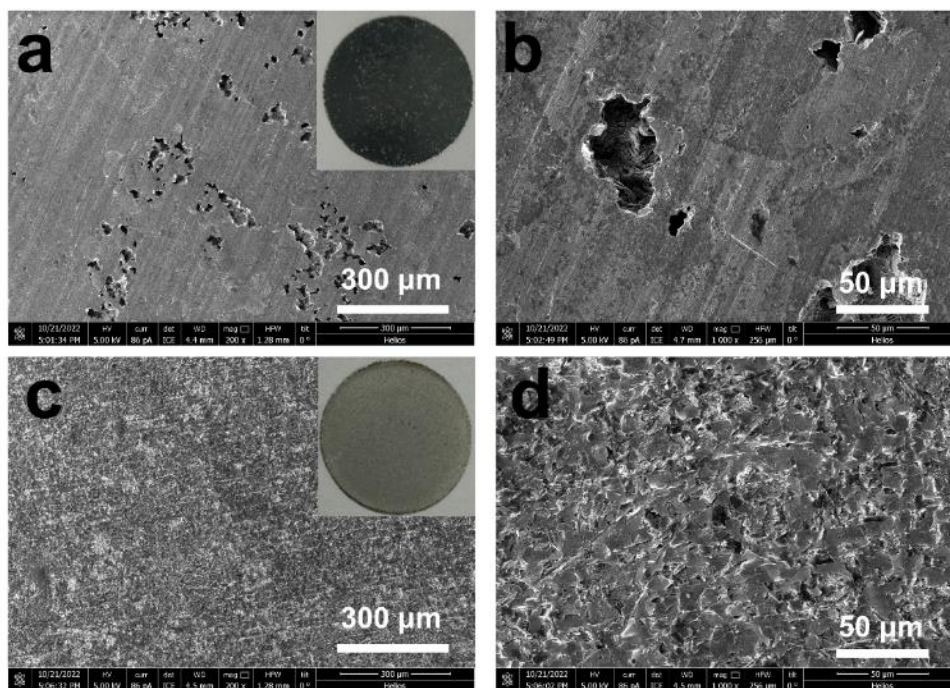

**Fig. S17.** SEM images of (a, b) bare Zn and (c, d) SnO<sub>2</sub>/Zn electrodes after stripping Zn for 1 mAh cm<sup>-2</sup> at 1 mA cm<sup>-2</sup>.

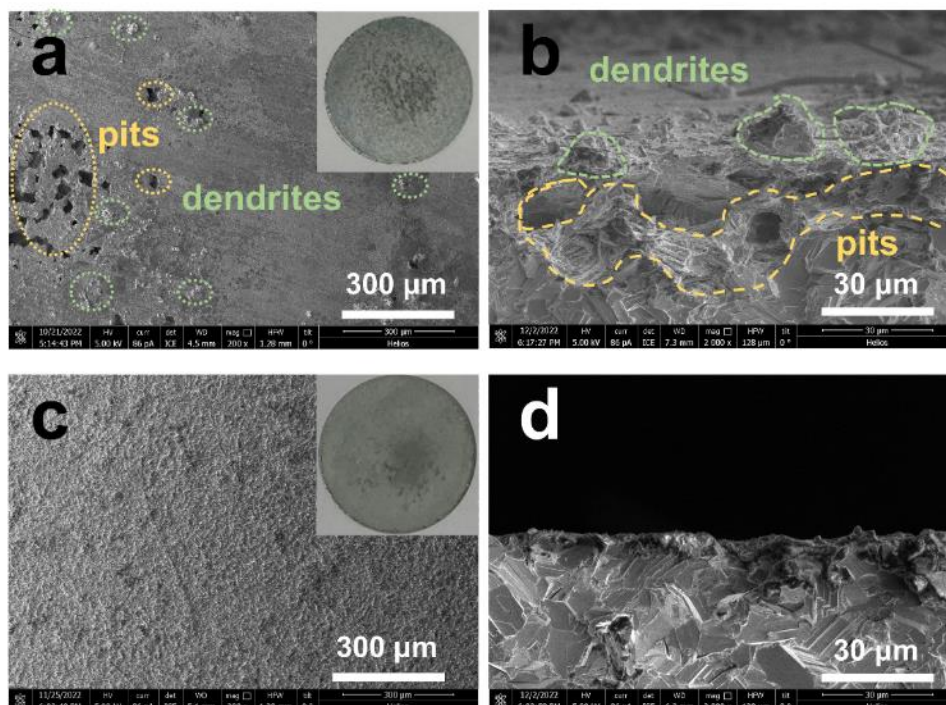

**Fig. S18.** (a and b) SEM images of (a) the bare Zn cathode surface after 20 cycles at 1 mA cm<sup>-2</sup> and 1 mAh cm<sup>-2</sup> and (b) the corresponding cross-sectional image. (c and d) SEM images of (c) the SnO<sub>2</sub>/Zn cathode surface after 700 cycles at 1 mA cm<sup>-2</sup> and 1 mAh cm<sup>-2</sup> and (d) the corresponding cross-sectional image.

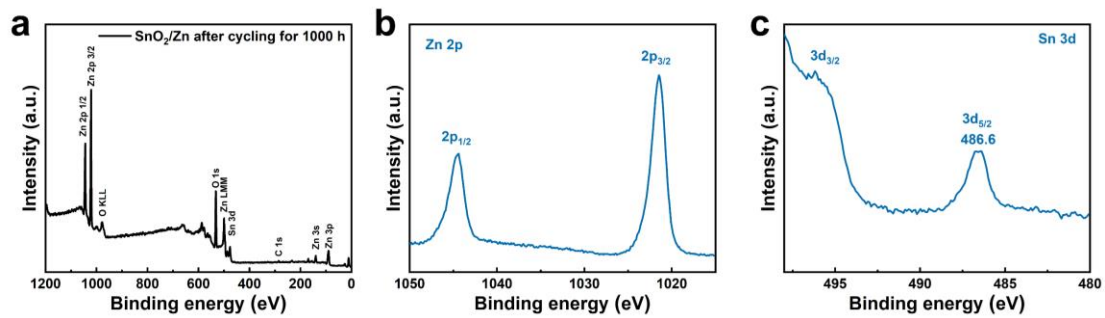

**Fig. S19.** (a) XPS survey spectrum and high resolution scan of (b) Zn 2p and (c) Sn 3d of the SnO<sub>2</sub>/Zn after cycling for 1000 h.

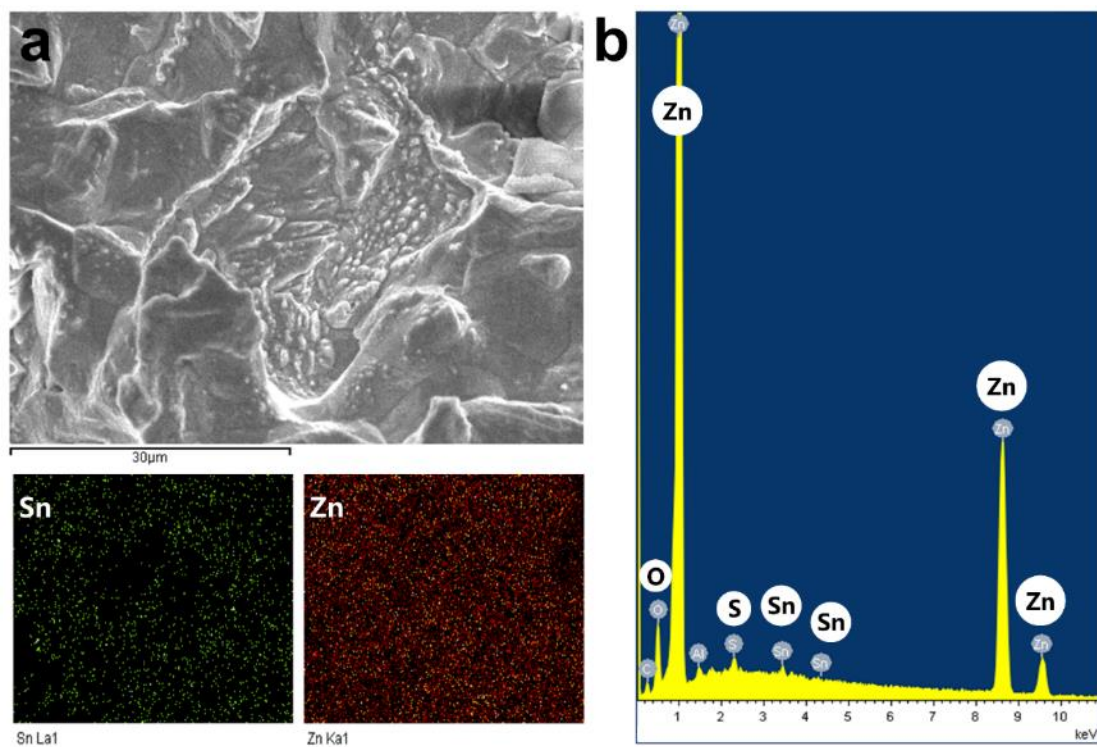

**Fig. S20.** (a) SEM image, elemental mappings and (b) the X-ray energy spectrum of the SnO<sub>2</sub>/Zn after cycling for 1000 h.

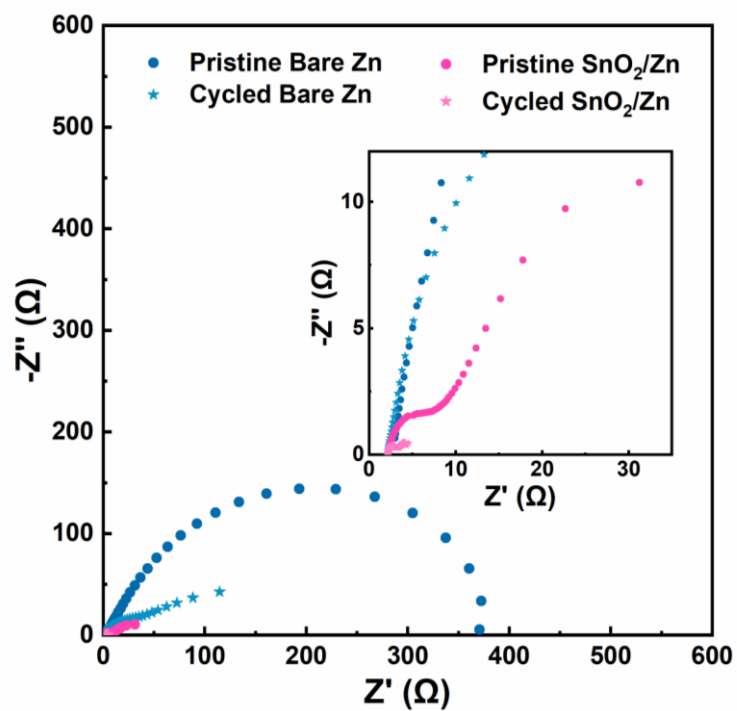

Fig. S21. EIS spectra (Nyquist plots) of bare Zn and SnO<sub>2</sub>/Zn symmetrical cells before and after 200 cycles at 10 mA cm<sup>-2</sup> and 1 mAh cm<sup>-2</sup>

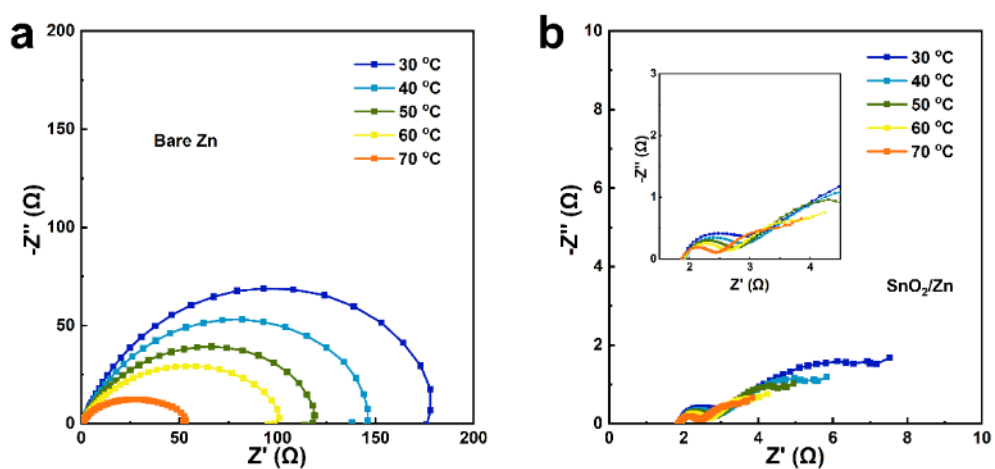

Fig. S22. EIS spectra (Nyquist plots) of Zn symmetrical cells without and with a SnO<sub>2</sub> layer at different temperatures

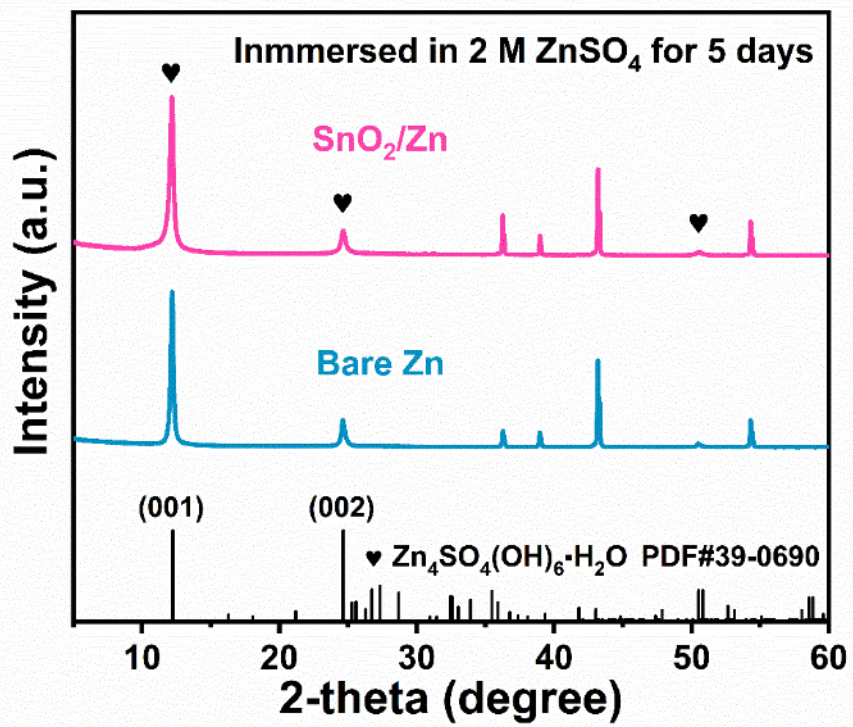

Fig. S23. XRD patterns of the Zn electrodes with or without the SnO<sub>2</sub> layer after immersing in 2 M ZnSO<sub>4</sub> electrolytes for 5 days

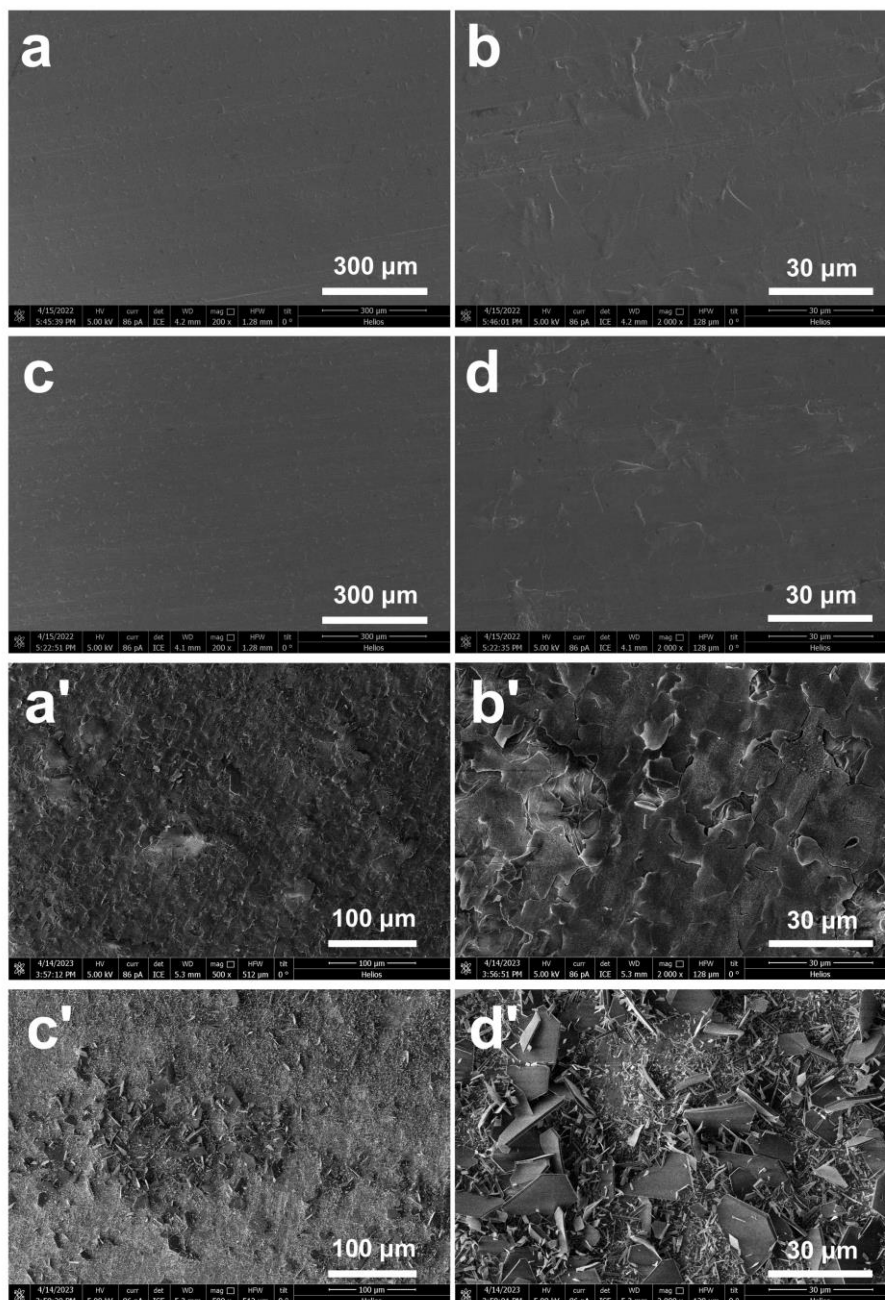

**Fig. S24.** SEM images of the Zn electrodes with (a, a', b, b') or without (c, c', d, d') the SnO<sub>2</sub> layer before (a-d) and after (a'-d') immersing in 2 M ZnSO<sub>4</sub> electrolytes for 5 days.

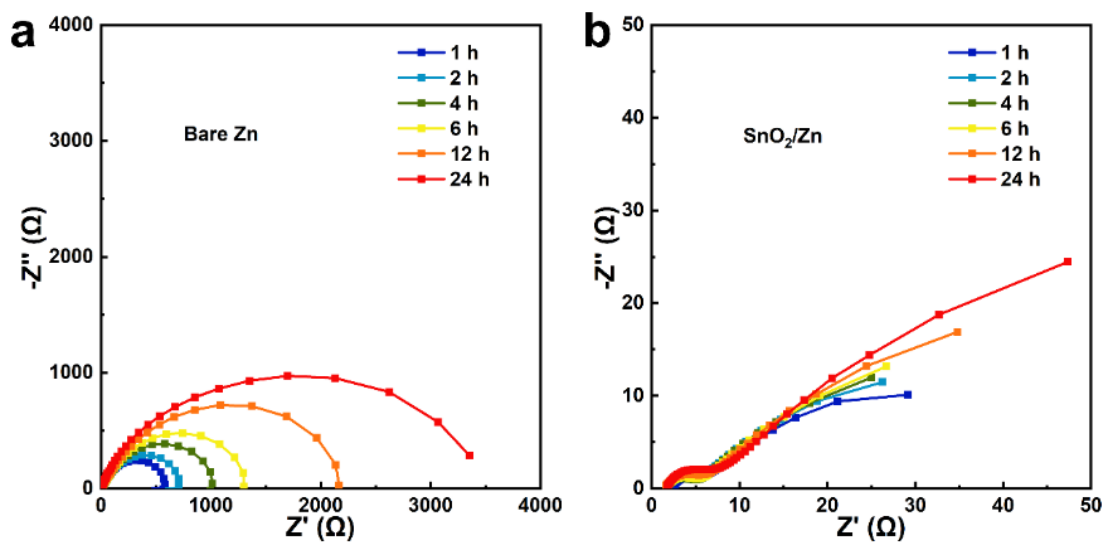

Fig. S25. Time-dependent EIS results of the Zn symmetrical cells without and with a SnO<sub>2</sub> layer.

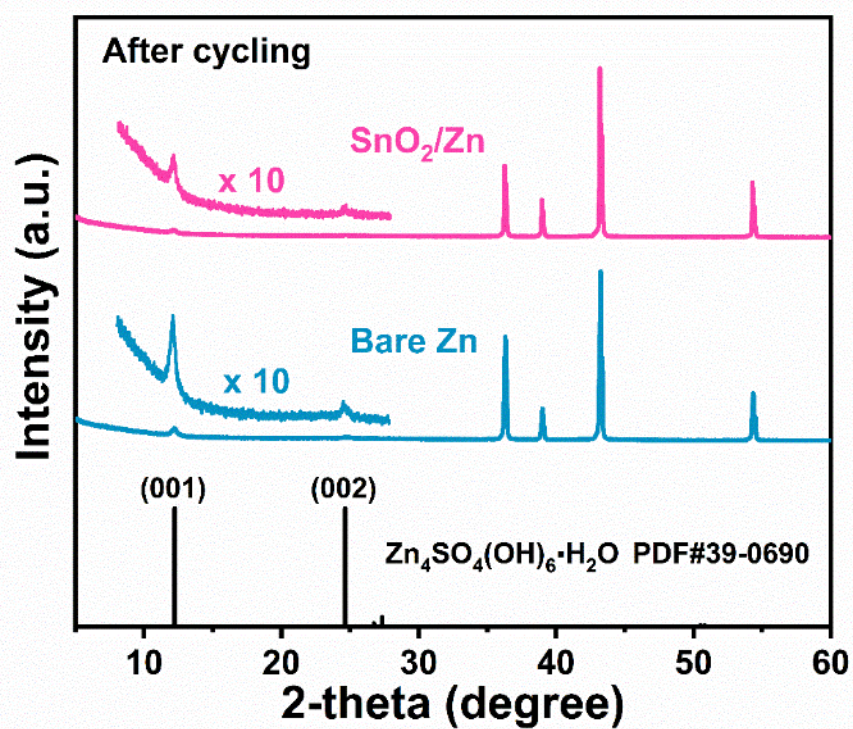

Fig. S26. XRD patterns of the Zn electrodes with or without the SnO<sub>2</sub> layer after 20 cycles



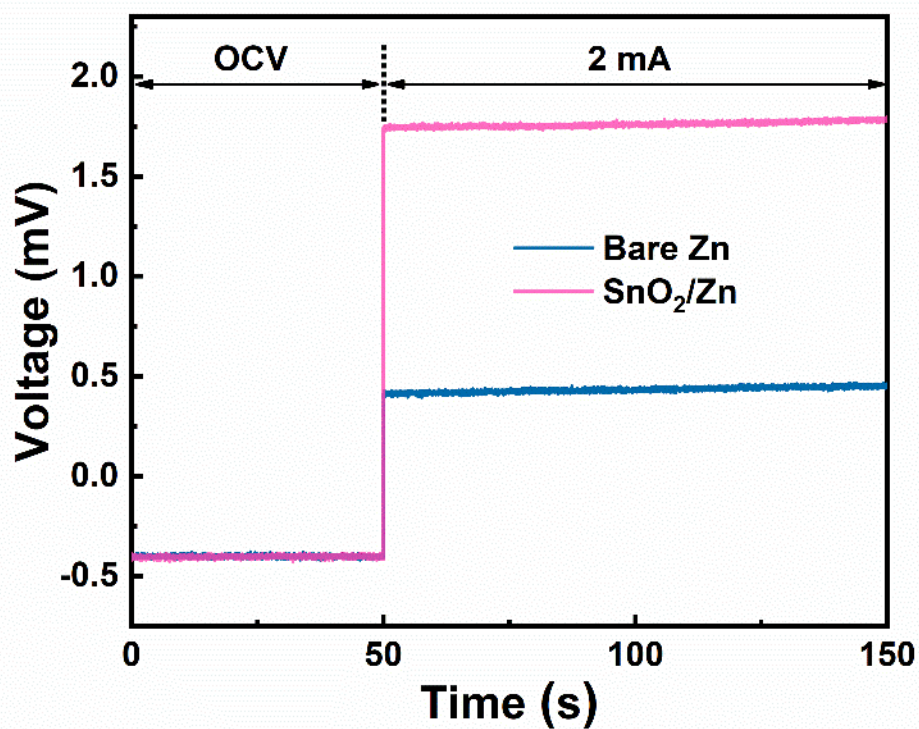

**Fig. S27.** The conductivity measurements of bare Zn and SnO<sub>2</sub>/Zn electrodes. A direct current of 2 mA is applied at 50<sup>th</sup> s, where the electrodes are individually sandwiched between two stainless steel blocking electrodes.

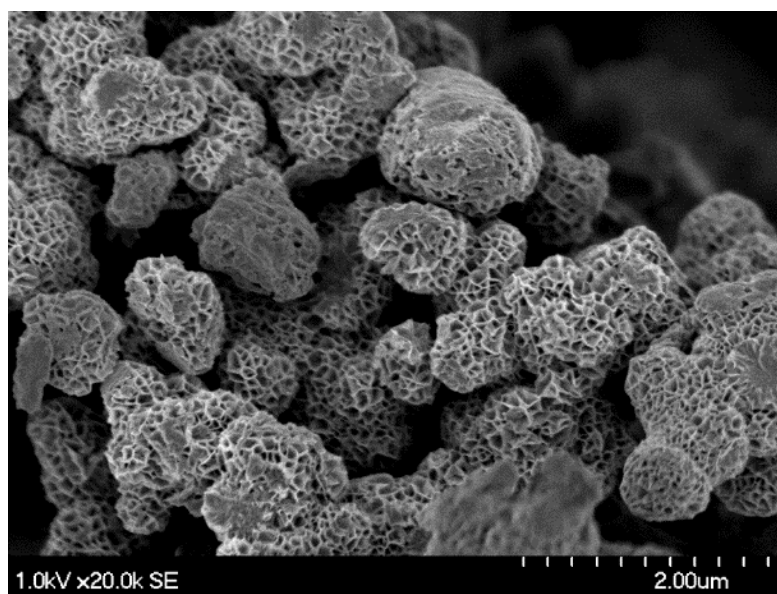

**Fig. S28.** SEM image of  $\delta$ -MnO<sub>2</sub>

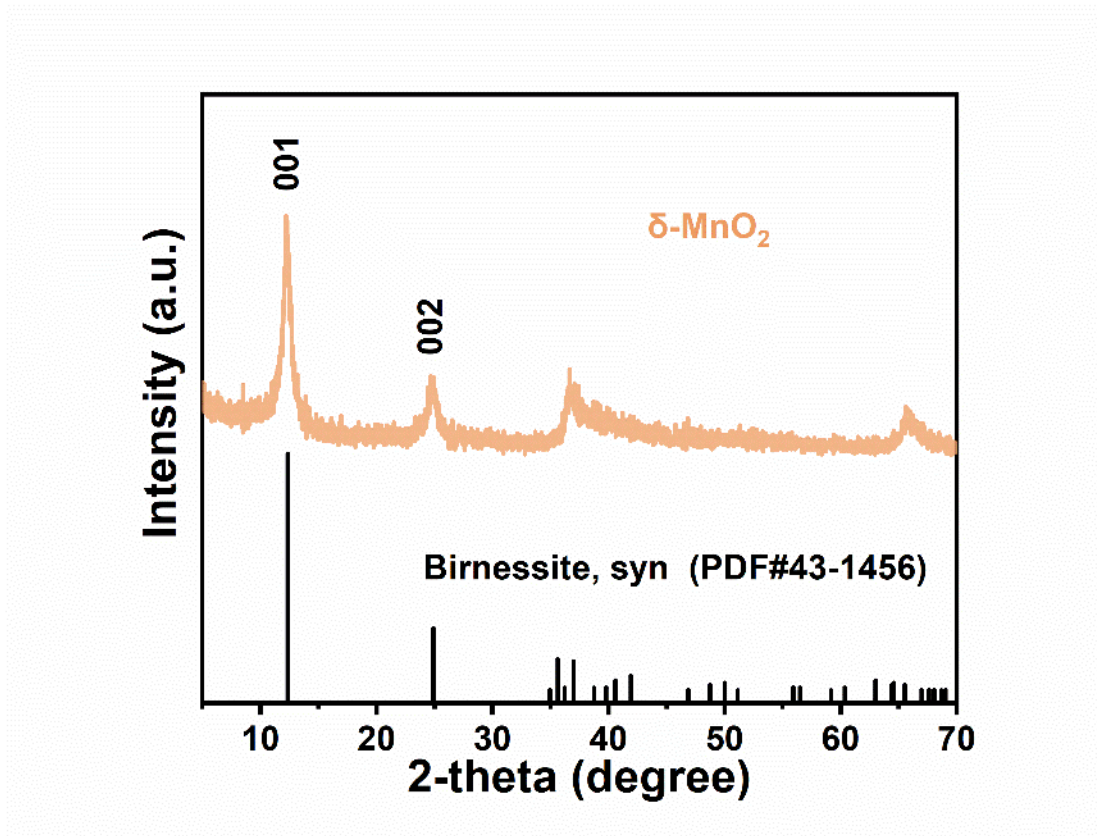

Fig. S29. XRD pattern of  $\delta$ -MnO<sub>2</sub>

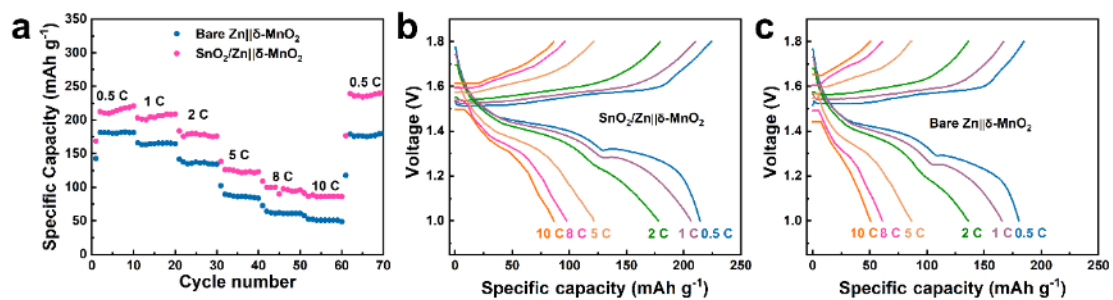

Fig. S30. (a) Rate performance of Zn ||  $\delta$ -MnO<sub>2</sub> full cells and the corresponding voltage profiles of (b) bare Zn ||  $\delta$ -MnO<sub>2</sub> and (c) SnO<sub>2</sub>/Zn ||  $\delta$ -MnO<sub>2</sub> full cells at different current densities from 0.5 C to 10 C.

**Table S1.** The Inductively Coupled Plasma Mass Spectrometry (ICP-MS) results of the 2 M ZnSO<sub>4</sub> electrolyte (5 mL) obtained after different treatments

| Element | Treatment                                | Content ( $\mu\text{g/mL}$ )          |
|---------|------------------------------------------|---------------------------------------|
| Sn      | Black sample <sup>T1</sup>               | 0.000001                              |
| Sn      | Ultrasound for 5 min <sup>T2</sup>       | 0.0058                                |
| Sn      | Immersing for 1 day <sup>T2</sup>        | 0.00045                               |
| Sn      | Immersing for 3 days <sup>T2</sup>       | 0.0028                                |
| Sn      | Immersing for 5 days <sup>T2</sup>       | 0.0036                                |
| Sn      | 60 cycles and 15 days rest <sup>T3</sup> | 0.011<br>(i.e., 0.055 $\mu\text{g}$ ) |

<sup>T1</sup>: original 2 M ZnSO<sub>4</sub> electrolyte (5 mL) without other treatment.

<sup>T2</sup>: the 2 M ZnSO<sub>4</sub> electrolyte (5 mL) with 5 disks SnO<sub>2</sub>/Zn electrodes ( $\Phi$  12 mm)

<sup>T3</sup>: the SnO<sub>2</sub>/Zn symmetrical cell was disassembled and fully immersed in the 2 M ZnSO<sub>4</sub> electrolyte (5 mL) after cycling for 60 times at 1 mA cm<sup>-2</sup> and 1 mAh cm<sup>-2</sup> and resting for 15 days. The 0.011  $\mu\text{g/mL}$  Sn means the dissolved Sn in the SnO<sub>2</sub>/Zn symmetrical cell is 0.055  $\mu\text{g}$ .

**Table S2.** Comparison of the SnO<sub>2</sub>/Zn anode with those of the reported Zn anodes at the current density of 2 mA cm<sup>-2</sup> and area capacity of 1 mAh cm<sup>-2</sup>

| Design strategies for stable Zn anodes | Voltage polarization(mV) | CE     | Cycle number | Reference        |
|----------------------------------------|--------------------------|--------|--------------|------------------|
| SnO <sub>2</sub> layer                 | 28.1                     | 99.3%  | 2000         | <b>This work</b> |
| 3D SS-CZ7                              | 49.5                     | 98.5%  | 470          | [8]              |
| DMA electrolyte additive               | 124.5                    | 98.7%  | 250          | [9]              |
| ZnTe@Zn                                | 75.8                     | 99.16% | 300          | [14]             |
| Zn-Mont                                | 80.4                     | 99.7%  | 1000         | [37]             |
| NCLZn                                  | 50                       | 99.0%  | 700          | [38]             |
| Zn/Bi                                  | 54                       | 99.6%  | 1000         | [39]             |
| 502 glue layer                         | 111.2                    | 99.74% | 200          | [40]             |
| PFSA layer                             | 75                       | 99.5%  | 600          | [41]             |
| h-Zn                                   | 45.4                     | 99.57% | 1200         | [42]             |
| CF separator                           | 60                       | 97.52% | 200          | [43]             |
| MOF/rGO Janus Separator                | 140                      | 99.2%  | 310          | [44]             |

**Table S3.** Summary and comparison of recent protective layers with nanometer thickness or oxide materials for stable Zn anodes<sup>S1-S5</sup>

| Protective layer of Zn anode   | Synthesis method           | Thickness | Asymmetrical cells        |                                        |                         | Symmetric cells                               |                                  |                                         | Reference |
|--------------------------------|----------------------------|-----------|---------------------------|----------------------------------------|-------------------------|-----------------------------------------------|----------------------------------|-----------------------------------------|-----------|
|                                |                            |           | Voltage polarization (mV) | Cycle number (C1, C2) <sup>a</sup>     | CE                      | (C1, C2) <sup>a</sup>                         | Overpotential (mV)               | Lifespan (h)                            |           |
| SnO <sub>2</sub>               | Spin-coating               | ~100 nm   | 28.1                      | 2000 (2-1)                             | 99.30%                  | 0.5-0.5<br>1-1<br>5-1<br>8-4<br>30-1<br>10-10 | 10<br>10<br>35<br>40<br>90<br>53 | 3900<br>950<br>850<br>800<br>300<br>200 | This work |
| MTSi-Hedp                      | Dip-coating                | ~264 nm   | -                         | -                                      | -                       | 1-0.5<br>1-1                                  | 30<br>28                         | 2000<br>1250                            | [6]       |
| HsGDY                          | In-situ growth             | ~490 nm   | -                         | -                                      | -                       | 2--                                           | 60                               | 2400                                    | [11]      |
| PA6/Zn(TfO) <sub>2</sub> /LDH  | Liquid self-assembly       | ~200 nm   | -                         | -                                      | -                       | 0.5-0.5                                       | 30                               | 1450                                    | [15]      |
| NGO                            | Langmuir-Blodgett method   | ~120 nm   | -                         | -                                      | -                       | 1-1<br>5-5                                    | 17<br>48                         | 1200<br>300                             | [21]      |
| BN                             | Magnetron sputtering       | ~100 nm   | 74.3                      | 150 (1-1)                              | 99.3%                   | 1-1<br>5-2.5                                  | 45<br>65                         | 3000<br>1600                            | [23]      |
| Al <sub>2</sub> O <sub>3</sub> | ALD                        | ~10 nm    | -                         | -                                      | -                       | 1-1                                           | 18                               | 500                                     | [24]      |
| L-ZMF                          | Radio frequency sputtering | ~25 nm    | -                         | -                                      | -                       | 1-1                                           | 24                               | 500                                     | [25]      |
| ILG                            | Spin-coating               | ~500 nm   | ~230                      | 100 (0.1-0.1)                          | -                       | 0.1-0.1<br>0.5-1.8                            | 50<br>80                         | 1000<br>400                             | [26]      |
| Cu                             | Thermal evaporation        | ~300 nm   | -<br>~95<br>-             | 700 (1-1)<br>3000 (10-1)<br>600 (10-3) | 99.4%<br>99.7%<br>99.6% | 1-1<br>5-2                                    | 38<br>70                         | 5000<br>1500                            | [27]      |
| SnO <sub>2</sub>               | ALD                        | ~10 nm    | -                         | -                                      | -                       | 0.25-0.05                                     | 10                               | 300                                     | [31]      |
| PFSA                           | Coating                    | ~500 nm   | 75                        | 200 (2-1)                              | 99.5%                   | 1-1                                           | 20                               | 800                                     | [41]      |
| SEI                            | Electrochemically pre-     | ~500 nm   | 52                        | 200 (1-1)                              | 99.5%                   | 1--                                           | 50                               | 2500                                    | [49]      |

|                           |                                                |           |            |                          |                |                      |           |              |      |
|---------------------------|------------------------------------------------|-----------|------------|--------------------------|----------------|----------------------|-----------|--------------|------|
|                           | cycling                                        |           |            |                          |                | 5--<br>10-5          | 60<br>120 | 600<br>450   |      |
| PS                        | Chemical reaction                              | ~6.7 nm   | -          | -                        | -              | 1-0.5                | 40        | 1000         | [51] |
| TiO <sub>2</sub>          | Atomic layer deposition (ALD)                  | ~8 nm     | -          | -                        | -              | 1-1                  | 25        | 150          | [53] |
| Alucone                   | Molecular layer deposition                     | ~12 nm    | 42.3       | 80 (0.5-0.5)             | 98.6%          | 3-1                  | 52        | 780          | [54] |
| CCF                       | Chemical conversion                            | ~320 nm   | 49         | 120 (1.13-0.57)          | 99.1%          | 4.4-1.1              | 60        | 1200         | [55] |
| β-PVDF                    | Spin-coating                                   | ~200 nm   | -          | -                        | -              | 0.25-0.05<br>1.5-0.3 | 40<br>49  | 2000<br>100  | [56] |
| COF                       | Dip-coating and self-assembly                  | 20-100 nm | ~60        | 500 (4-1)                | 99.95%         | 1-1                  | 27        | 400          | [57] |
| FCOF                      | Pulling                                        | ~100 nm   | 293<br>210 | 320 (80-1)<br>250 (40-2) | 97.2%<br>97.3% | 5-1<br>40-1          | 60<br>200 | 1700<br>450  | [58] |
| 3D-COOH-COF               | In-situ growth and post-synthetic modification | ~150 nm   | 104        | 1000 (1-1)               | 99.5 %         | 1-1<br>3-1           | 40<br>50  | 2000<br>1200 | [59] |
| PIM                       | Casting                                        | ~300 nm   | 50         | ~380 (3-3)               | 99.6%          | 0.5-0.5<br>5-5       | 30<br>62  | 1700<br>485  | [60] |
| Al-ZnO (AZO)              | Magnetron sputtering                           | ~400 nm   | 69         | 100 (1-0.5)              | 99.51%         | 10-2<br>10-4.69      | 51<br>60  | 600<br>200   | [61] |
| Passivation layer (Zn@Mn) | Chemical passivation                           | ~65 nm    | -          | -                        | -              | 1-1<br>5-5           | 47<br>70  | 4000<br>85   | [62] |
| AgZn <sub>3</sub>         | Plasma sputtering                              | ~570 nm   | 55         | 375 (1-1)                | -              | 1-1<br>4-2           | 32<br>39  | 1150<br>540  | [63] |
| pi                        | Spin coating                                   | ~570 nm   | -          | 1000 (4--)               | 99.5%          | 4-2                  | 25        | 300          | [64] |
| SIR                       | Dripping                                       | ~360 nm   | 45         | 1000 (1-1)               | 99.7%          | 2-2<br>10-10         | 40<br>58  | 3500<br>2000 | [65] |
| CCF-K                     | Radiofrequency                                 | ~200 nm   | -          | 4693 (1-1)               | 99.57%         | 1-1                  | 21        | 10000        | [66] |

|                                |                                     |                          |     |                 |        |                     |          |              |      |
|--------------------------------|-------------------------------------|--------------------------|-----|-----------------|--------|---------------------|----------|--------------|------|
|                                | plasma-assisted thermal evaporation |                          |     |                 |        |                     |          |              |      |
| MoS <sub>2</sub>               | Electrodeposition                   | ~40 nm                   | -   | -               | -      | 2.5-0.416           | 60       | 175          | [S1] |
| TpPa-SO <sub>3</sub> H         | Interfacial reaction                | ~100 nm                  | -   | 1000 (1--)      | 99%    | -                   | -        | -            | [S2] |
| Fe <sub>2</sub> O <sub>3</sub> | ALD                                 | -                        | -   | -               | -      | 0.1-0.05<br>1-1     | 20<br>24 | 1000<br>300  | [S3] |
| m-TiO <sub>2</sub>             | Blade-coating                       | ~20 μm                   | 57  | 200 (4.4-1.1)   | 98.95% | (4.4-1.1)           | 37       | 500          | [S4] |
| SiO <sub>2</sub>               | Coating                             | ~20 μm                   | -   | -               | -      | 0.5-0.25<br>1-0.5   | 25<br>50 | 2000<br>1000 | [S5] |
| ZnO                            | liquid-phase synthesis              | ~5 μm                    | 45  | 300 (2-0.5)     | 99.55% | 5-1.25              | 43       | 500          | [12] |
| F-TiO <sub>2</sub>             | Slurry-pasting                      | ~20 μm                   | -   | -               | -      | 1-1                 | 25       | 460          | [45] |
| CeO <sub>2</sub>               | Scraping                            | ~10 μm                   | 108 | 180 (2-1)       | 99.8%  | 0.5-0.25<br>5-2.5   | 60<br>80 | 1300<br>1300 | [17] |
| Nb <sub>2</sub> O <sub>5</sub> | Spin coating                        | 100 μm                   | 72  | 100 (1-0.5)     | 98.01% | 0.25-0.125<br>1-0.5 | 40<br>44 | 1000<br>1000 | [20] |
| ZrO <sub>2</sub>               | Castig                              | ~4 μm                    | 72  | 70 (1-1)        | 95.5%  | 0.25-0.125<br>5-1   | 38<br>32 | 3800<br>2100 | [16] |
| Sc <sub>2</sub> O <sub>3</sub> | Castig                              | 0.65 mg cm <sup>-2</sup> | 64  | 260 (1.13-0.56) | 99.85% | 1-1                 | 40       | 200          | [70] |

<sup>a</sup> (C1, C2): current density (mA cm<sup>-2</sup>) and area capacity (mAh cm<sup>-2</sup>).

**Table S4.** Summary of the performance of full cells with MnO<sub>2</sub> as cathodes and Zn as anodes (1C=0.308 A g<sup>-1</sup>)

| Anode                                     | Cathode            | Electrolyte                                           | Woking voltage (V) | Current density            | Capacity (mAh g <sup>-1</sup> ) | Cycle number  | Capacity retention | Reference        |
|-------------------------------------------|--------------------|-------------------------------------------------------|--------------------|----------------------------|---------------------------------|---------------|--------------------|------------------|
| SnO <sub>2</sub> /Zn                      | δ-MnO <sub>2</sub> | 2 M ZnSO <sub>4</sub> +0.1 M MnSO <sub>4</sub>        | 1.0-1.8            | 2C<br>0.5C<br>1C           | 133.4<br>210<br>205             | 500<br>-<br>- | 96.9%<br>-<br>-    | <b>This work</b> |
| Zn                                        | δ-MnO <sub>2</sub> | 1 M ZnSO <sub>4</sub>                                 | 1.0-1.8            | 0.166<br>A g <sup>-1</sup> | ~198                            | -             | -                  | [70]             |
| Zn                                        | δ-MnO <sub>2</sub> | 1 M ZnSO <sub>4</sub> +0.1 M MnSO <sub>4</sub>        | 1.0-1.8            | 0.1 A g <sup>-1</sup>      | 170                             | -             | -                  | [71]             |
| Zn                                        | δ-MnO <sub>2</sub> | 1 M ZnSO <sub>4</sub> +0.1 M MnSO <sub>4</sub>        | 1.0-1.8            | 0.1 A g <sup>-1</sup>      | 133                             | -             | -                  | [72]             |
| Zn                                        | δ-MnO <sub>2</sub> | 2 M ZnSO <sub>4</sub> +0.1 M MnSO <sub>4</sub>        | 1.0-1.8            | 0.1 A g <sup>-1</sup>      | 194                             | -             | -                  | [73]             |
| Cu@Zn                                     | β-MnO <sub>2</sub> | 3 M ZnSO <sub>4</sub> +0.1 M MnSO <sub>4</sub>        | 0.8-1.9            | 1 A g <sup>-1</sup>        | ~115                            | 500           | ~76%               | [26]             |
| SnO <sub>2</sub> @Zn                      | α-MnO <sub>2</sub> | 3 M Zn(CF <sub>3</sub> SO <sub>3</sub> ) <sub>2</sub> | 0.8-1.8            | 1 A g <sup>-1</sup>        | ~117                            | 1500<br>(500) | ~32%<br>(~68%)     | [31]             |
| Sc <sub>2</sub> O <sub>3</sub> -coated Zn | MnO <sub>2</sub>   | 2 M ZnSO <sub>4</sub> +0.1 M MnSO <sub>4</sub>        | 0.8-1.8            | 0.5 A g <sup>-1</sup>      | 216.1                           | 50            | ~57%               | [74]             |
| BTO@Zn                                    | MnO <sub>2</sub>   | 2 M ZnSO <sub>4</sub> +0.1 M MnSO <sub>4</sub>        | 1.0-1.8            | 2 A g <sup>-1</sup>        | ~112                            | 300           | 67%                | [75]             |

|                                  |                    |                                                |         |                     |      |               |                  |      |
|----------------------------------|--------------------|------------------------------------------------|---------|---------------------|------|---------------|------------------|------|
| Zn/C <sub>3</sub> N <sub>4</sub> | MnO <sub>2</sub>   | 2 M ZnSO <sub>4</sub>                          | 0.8-1.8 | 1 A g <sup>-1</sup> | ~132 | 500           | 94.1%            | [76] |
| Zn@ZnSe                          | α-MnO <sub>2</sub> | 2 M ZnSO <sub>4</sub> +0.1 M MnSO <sub>4</sub> | 1.0-1.8 | 2C                  | 273  | 1800<br>(500) | ~34%<br>(~54%)   | [77] |
| ZnO/C-Zn                         | α-MnO <sub>2</sub> | 2 M ZnSO <sub>4</sub> +0.1 M MnSO <sub>4</sub> | 0.8-1.8 | 1 A g <sup>-1</sup> | 151  | 1000<br>(500) | ~48.7%<br>(~73%) | [78] |



## References

- S1 S. Bhoyate, S. Mhin, J. E. Jeon, K. Park, J. Kim and W. Choi, *ACS Appl Mater Interfaces*, 2020, **12**, 27249-27257.
- S2 J. Zhao, Y. P. Ying, G. L. Wang, K. D. Hu, Y. D. Yuan, H. L. Ye, Z. L. Liu, J. Y. Lee and D. Zhao, *Energy Storage Mater.*, 2022, **48**, 82-89.
- S3 Z. Zeng, Y. Zeng, L. Sun, H. Mi, L. Deng, P. Zhang, X. Ren and Y. Li, *Nanoscale*, 2021, **13**, 12223-12232.
- S4 X. Zhou, P. Cao, A. Wei, A. Zou, H. Ye, W. Liu, J. Tang and J. Yang, *ACS Appl Mater Interfaces*, 2021, **13**, 8181-8190.
- S5 X. Han, H. T. Leng, Y. Qi, P. Yang, J. X. Qiu, B. Zheng, J. S. Wu, S. Li and F. W. Huo, *Chem. Eng. J.*, 2022, **431**, 133931.
